# Supplementary material for: High genetic diversity at the regional scale and possible speciation in Sebacina epigaea and S. incrustans
Source: PubMed Central journal article supplement (PMC3665632; doi:10.1186/1471-2148-13-102), 2013-05-22

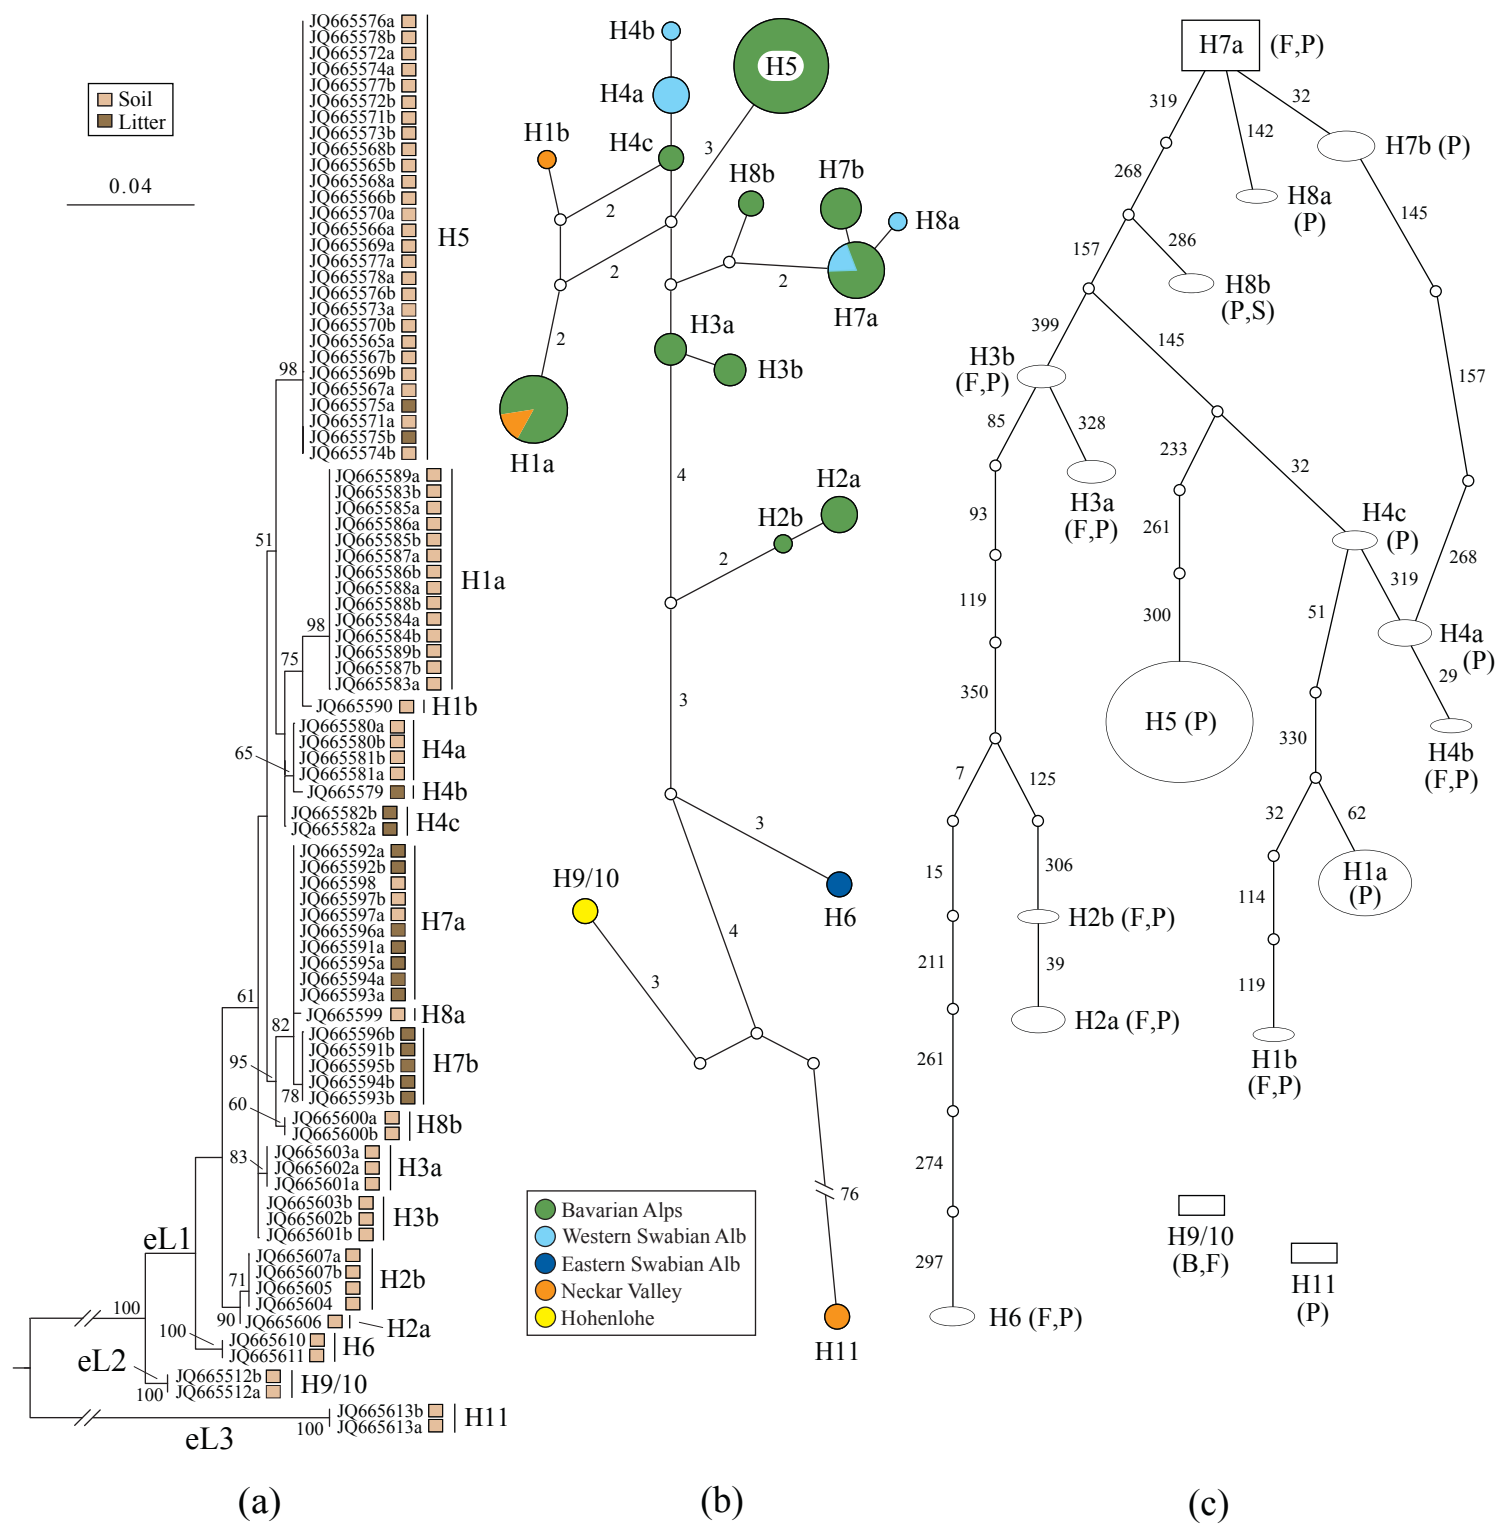

Supplement: 1471-2148-13-102-S1.pdf [file 1471-2148-13-102-S1.pdf]
