# Supplementary material for: High genetic diversity at the regional scale and possible speciation in Sebacina epigaea and S. incrustans
Source: PubMed Central journal article supplement (PMC3665632; doi:10.1186/1471-2148-13-102), 2013-05-22
Supplement: 1471-2148-13-102-S3.pdf [file 1471-2148-13-102-S3.pdf]

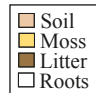

0.06

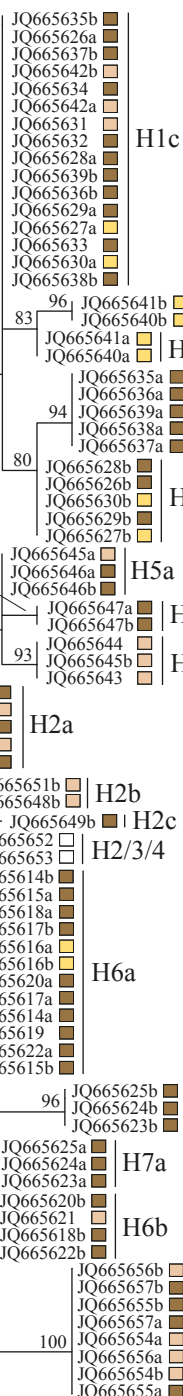

H1c

H1e

H1d

H1e

H1d

H5a

H5c

H5b

H2a

H2b

H2c

H6a

H7b

H7a

H6b

H8

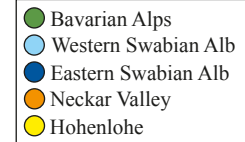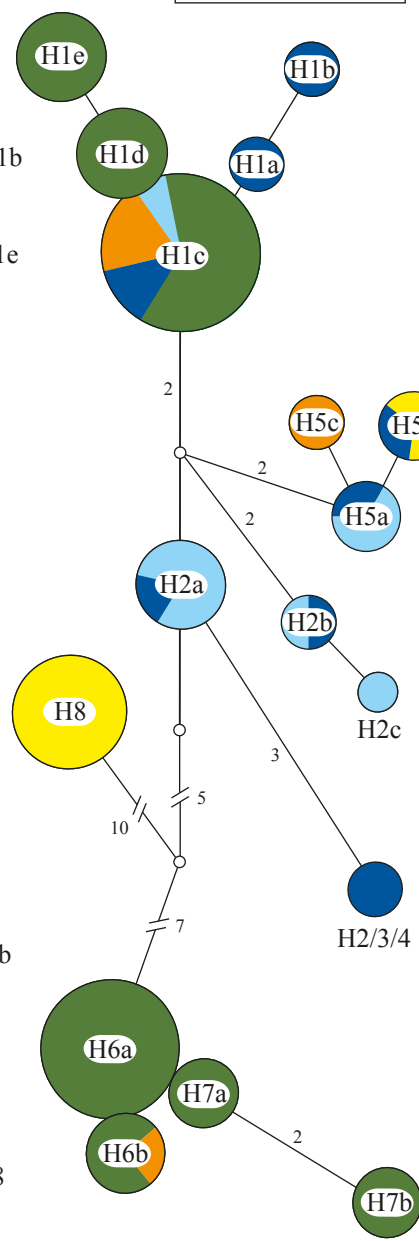

(b)

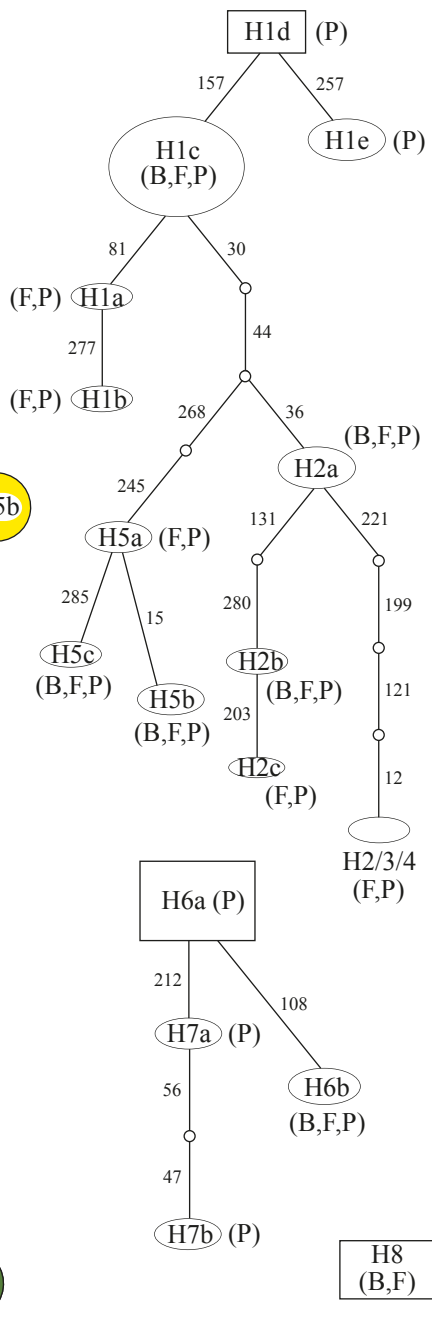

(c)

(a)
