# Supplementary material for: High genetic diversity at the regional scale and possible speciation in Sebacina epigaea and S. incrustans
Source: PubMed Central journal article supplement (PMC3665632; doi:10.1186/1471-2148-13-102), 2013-05-22
Supplement: 1471-2148-13-102-S5.pdf [file 1471-2148-13-102-S5.pdf]

|                      |     |    | Genetic divergence [%] |       | No. of haplotypes |       | No. of unconnected networks |       |
|----------------------|-----|----|------------------------|-------|-------------------|-------|-----------------------------|-------|
|                      | n+n | n  | Rec +                  | Rec - | Rec +             | Rec - | Rec +                       | Rec - |
| <i>S. epigaea</i>    |     |    |                        |       |                   |       |                             |       |
| <b>eL1</b>           | 48  | 60 | 7.57                   | 5.16  | 11                | 8     | 7                           | 1     |
| <b>eL2</b>           | 1   | 2  | 0.19                   | 0.56  | 1                 | 2     | 1                           | 1     |
| <b>eL3</b>           | 1   | 1  | 0.00                   | 0.00  | 1                 | 1     | 1                           | 1     |
| <b>All</b>           | 50  | 63 | 12.11                  | 11.61 | 13                | 11    | 9                           | 3     |
| <i>S. incrustans</i> |     |    |                        |       |                   |       |                             |       |
| <b>iL1</b>           | 30  | 44 | 2.82                   | 1.28  | 4                 | 5     | 3                           | 1     |
| <b>iL2</b>           | 12  | 13 | 2.72                   | 1.94  | 2                 | 2     | 2                           | 1     |
| <b>iL3</b>           | 6   | 6  | 0.00                   | 0.00  | 1                 | 1     | 1                           | 1     |
| <b>All</b>           | 48  | 63 | 7.70                   | 6.25  | 7                 | 8     | 6                           | 3     |
