# Supplementary material for: High genetic diversity at the regional scale and possible speciation in Sebacina epigaea and S. incrustans
Source: PubMed Central journal article supplement (PMC3665632; doi:10.1186/1471-2148-13-102), 2013-05-22
Supplement: 1471-2148-13-102-S8.pdf [file 1471-2148-13-102-S8.pdf]

| Marker name          | Primer sequence 5'→3'  | Reference                                                      |
|----------------------|------------------------|----------------------------------------------------------------|
| <b>(a) ITS+D1/D2</b> |                        |                                                                |
| ITS1F                | CTTGGTCATTTAGAGGAAGTAA | [60]                                                           |
| NL4                  | GGTCCGTGTTTCAAGACGG    | [61]                                                           |
| ITS4*                | TCCTCCGCTTATTGATATGC   | [62]                                                           |
| LR0R*                | ACCCGCTGAACTTAAGC      | R. Vilgalys lab:<br>biology.duke.edu/fungi/mycolab/primers.htm |
| 5.8SR*               | TCGATGAAGAACGCAGCG     | [63]                                                           |
| <b>(b) RPB2</b>      |                        |                                                                |
| fRPB2-5F             | GAYGAYMGWGATCAYTTYGG   | [64]                                                           |
| bRPB2-7.1R           | CCCATRGCYTGYYTTCATDGC  | [25]                                                           |
| sRPB2-5.1F           | CTGCTAYAGAARAAGG       | This study                                                     |
| sRPB2-7R             | ATGATGCTYGAACAAC       | This study                                                     |
| fRPB2-6F*            | TGGGGYATGGTNTGYCCYGC   | [25]                                                           |
| sRPB2-6.5F*          | TCTTCGTAGTTGATGG       | This study                                                     |
| sRPB2-6.1R*          | AGRTTCTTGACAAGCC       | This study                                                     |
| <b>(c) ATP6</b>      |                        |                                                                |
| ATP6-3               | TCTCCTTTAGAACAATTTGA   | [26]                                                           |
| ATP6-4               | AAGTACGAAWACWTGWGMTTG  | [26]                                                           |
| sATP6-3              | TGAAGTYGTAAGTCTTTTAGG  | This study                                                     |
